# Supplementary material
Source: publisher site journal article supplement (https://www.dovepress.com/article/339600)
Supplement: Supplementary file 1 [file get_supplementary_file.php]

**Supplementary Materials**

**Supplementary Materials Checklist**

1. **Online Methods**
2. **Online Table 1.** Definitions of baseline characteristics
3. **Online Table 2.** Baseline characteristics of patients with myocardial ischemia detected by D-SPECT
4. **Online Table 3.** Baseline characteristics of the studied cohort by coronary stenosis severity and SUA levels
5. **Online Table 4.** Sensitivity analysis
6. **Online Table 5.** Sex-specific analysis
7. **Online Figure 1.** Flowchart of the studied cohort
8. **Online Figure 2.** Baseline characteristics of the studied cohort before and after PSM
9. **Online References**

**Online Methods**

**PSM analysis**

Binary logistic regression analysis was performed to calculate propensity scores to balance baseline characteristics in patients with hyperuricemia and normouricemia. Matching was conducted with a 1:1 matching protocol without replacement, using a caliper width equal to 0.10 of the SD of the propensity score. Covariates used to calculate the propensity scores included age, gender, body mass index (BMI), current smoker, hypertension, diabetes, hyperlipidemia, prior stroke, prior heart failure, prior atrial fibrillation, prior percutaneous coronary intervention, serum creatinine, and left ventricular ejection fraction (LVEF).

**Online Table 1.** Definitions of baseline characteristics

| **Characteristics** | **Definitions** |
| --- | --- |
| Hypertension | Hypertension is defined as an SBP≥ 140 mmHg and/or DBP≥ 90 mmHg or the use of antihypertensive drugs. |
| Diabetes | Diabetes is defined as fasting glucose>126 mg/dl, HbA1c>6.5% or the use of insulin or other antidiabetic drugs. |
| Hyperlipidemia | Hyperlipidemia is defined as a total cholesterol ≥240 mg/dl, LDL-c ≥160 mg/dl, triglyceride levels ≥ 200 mg/dl, or use of statins or other lipid-lowing drugs. |
| BMI | BMI (kg/m2) is calculated as weight in kilograms divided by the square of height in meters |
| Prior heart failure | Prior heart failure is defined as patients who have a documented HF history (NYHA class> I) and receive diuretics or other treatments. |
| HEART score | HEART score is calculated based on the following 5 variables: **pre-test possibility of CAD** (slightly, moderately, and highly suspicious), **ECG characteristics**, **age**, **known risk factors of CAD** (hypertension, diabetes, BMI>30 kg/m2, smoking habit, positive family history, atherosclerotic disease: prior MI, PCI/CABG, cerebrovascular disease /TIA, or peripheral arterial disease), and **initial troponin**.1 |
| Summed stress score | Summed stress score is calculated by summing all defects on the stress image. |
| Summed rest score | Summed stress score is calculated by summing all defects on the rest image. |
| Summed difference score | Summed difference score is the sum of the difference between each stress and rest score for each segment. |
| Transient ischemic dilation (TID) ratio | TID ratio is defined as the ratio of left ventricular volume on the sum of the post-stress gated images to that on the sum of the rest gated images.2 Abnormal TID ratio is defined as a TID ratio of ≥ 1.18 in men and ≥ 1.22 in women.3, 4 |

**Online Table 2.** Baseline characteristics of patients with myocardial ischemia detected by D-SPECT

|  | **Patients with myocardial ischemia** | | | |
| --- | --- | --- | --- | --- |
|  | **Total**  **(N=411)** | **Hyperuricemia**  **(N=99)** | **Normouricemia**  **(N=312)** | **P-value** |
| **Demography** |  |  |  |  |
| Age | 63.9±9.4 | 62.8±9.3 | 64.2±9.4 | 0.193 |
| Male | 237 (57.7) | 63 (63.6) | 174 (55.8) | 0.167 |
| Body mass index | 24.8±3.0 | 25.4±3.3 | 24.7±2.9 | 0.031 |
| Current smoker | 98 (23.8) | 22 (22.2) | 76 (24.4) | 0.664 |
| Family history of CAD | 18 (4.4) | 4 (4.0) | 14 (4.5) | 0.850 |
| HEART score | 7 (5-8) | 6 (4-7) | 7 (5-8) | 0.242 |
| **Medical history** |  |  |  |  |
| Hypertension | 265 (64.5) | 71 (71.7) | 194 (62.2) | 0.084 |
| Diabetes | 114 (27.7) | 24 (24.2) | 90 (28.8) | 0.373 |
| Dyslipidemia | 60 (14.6) | 14 (14.1) | 46 (14.7) | 0.882 |
| Prior stroke | 68 (16.6) | 15 (15.2) | 53 (17.0) | 0.668 |
| Prior heart failure | 11 (2.7) | 6 (6.1) | 5 (1.6) | 0.017 |
| Prior atrial fibrillation | 27 (6.6) | 9 (9.2) | 18 (5.8) | 0.235 |
| Prior PCI | 211 (51.3) | 46 (46.5) | 165 (52.9) | 0.265 |
| **Admission presentation** |  |  |  |  |
| Heart rate | 76 (69-81) | 78 (71-82) | 75 (68-81) | 0.143 |
| Systolic BP | 132 (120-146) | 130 (122-145) | 133 (119-146) | 0.960 |
| Diastolic BP | 77 (69-84) | 78 (69-86) | 77 (68-83) | 0.148 |
| LVEF | 63 (60-65) | 62 (58-65) | 63 (60-65) | 0.017 |
| **Laboratory indices** |  |  |  |  |
| CRP | 3.02 (2.98-3.23) | 3.02 (3.02-3.23) | 3.02 (2.48-3.22) | 0.251 |
| Serum creatinine | 71.8 (62.5-83.3) | 77.2 (66.1-91.0) | 70.2 (60.5-80.9) | <0.001 |
| TC | 3.69 (3.07-4.45) | 4.13 (3.29-4.73) | 3.63 (3.03-4.40) | 0.005 |
| LDL-c | 2.02 (1.46-2.64) | 2.15 (1.65-2.86) | 1.99 (1.39-2.50) | 0.004 |
| TG | 1.28 (0.99-1.95) | 1.53 (0.99-2.30) | 1.26 (0.99-1.75) | 0.015 |
| Fasting glucose | 5.2 (4.8-6.1) | 5.3 (4.9-5.9) | 5.2 (4.8-6.1) | 0.843 |
| Serum uric acid | 5.5 (4.6-6.6) | 7.5 (7.0-8.1) | 5.1 (4.4-5.8) | <0.001 |
| Peak TnT | 0.009 (0.006-0.016) | 0.009 (0.006-0.017) | 0.008 (0.005-0.016) | 0.189 |
| Peak NT-pro BNP | 80.3 (40.8-203.7) | 76.5 (36.5-237.2) | 82.2 (40.8-200.3) | 0.893 |
| **Medication at discharge** |  |  |  |  |
| Aspirin | 267 (65.0) | 59 (59.6) | 208 (66.7) | 0.199 |
| P2Y12 receptor antagonist | 267 (65.0) | 63 (63.6) | 204 (65.4) | 0.751 |
| Statin | 362 (88.1) | 88 (88.9) | 274 (87.8) | 0.775 |
| ACEI/ARB | 191 (46.5) | 50 (50.5) | 141 (45.2) | 0.356 |
| β-blocker | 188 (45.7) | 46 (46.5) | 142 (45.5) | 0.868 |
| CCB | 163 (39.7) | 44 (44.4) | 119 (38.1) | 0.264 |
| Diuretic | 47 (11.4) | 13 (13.0) | 34 (10.9) | 0.572 |
| Urate-lowering agent | 2 (0.5) | 0 (0) | 2 (0.6) | 1.000 |

Values are presented as mean±SD, median (IQR), or n (%), as appropriate.

ACEI/ARB, angiotensin-converting-enzyme inhibitors/angiotensin receptor blockers; BNP, brain natriuretic peptide; BP, blood pressure; CAD, coronary artery disease; CCB, calcium channel blocker; CRP, C-reactive protein; LDL, low-density lipoprotein; LVEF, left ventricular ejection fraction; PCI, percutaneous coronary intervention; TC, total cholesterol; TnT, troponin T.

**Online Table 3.** Baseline characteristics of the studied cohort by coronary stenosis severity and SUA levels

|  | **Obstructive CAD** | |  | **Nonobstructive CAD** | |  |
| --- | --- | --- | --- | --- | --- | --- |
|  | **Hyperuricemia**  **(N=110)** | **Normouricemia**  **(N=322)** | **P value** | **Hyperuricemia**  **(N=67)** | **Normouricemia**  **(N=196)** | **P value** |
| **Demography** |  |  |  |  |  |  |
| Age | 62.9±10.2 | 65.1±9.3 | 0.041 | 60.3±10.3 | 61.6±9.6 | 0.479 |
| Male | 76 (69.1) | 212 (65.8) | 0.532 | 27 (40.3) | 77 (39.3) | 0.884 |
| Body mass index | 25.9±3.0 | 24.6±2.9 | <0.001 | 26.3±3.7 | 24.2±3.2 | <0.001 |
| Current smoker | 29 (26.4) | 83 (25.8) | 0.903 | 13 (19.4) | 38 (19.4) | 1.00 |
| Family history of CAD | 8 (7.3) | 15 (4.7) | 0.292 | 1 (1.5) | 10 (5.1) | 0.203 |
| HEART score | 7 (6-8) | 7 (6-8) | 0.213 | 3 (2-4) | 3 (2-4) | 0.139 |
| **Medical history** |  |  |  |  |  |  |
| Hypertension | 82 (74.5) | 218 (67.7) | 0.179 | 39 (58.2) | 85 (43.4) | 0.036 |
| Diabetes | 31 (28.2) | 101 (31.4) | 0.531 | 11 (16.4) | 28 (14.3) | 0.672 |
| Dyslipidemia | 26 (23.6) | 57 (17.7) | 0.173 | 4 (6.0) | 19 (9.7) | 0.352 |
| Prior stroke | 17 (15.5) | 59 (18.3) | 0.495 | 6 (9.0) | 25 (12.8) | 0.405 |
| Prior heart failure | 6 (5.5) | 4 (1.2) | 0.011 | 1 (1.5) | 4 (2.0) | 0.777 |
| Prior atrial fibrillation | 12 (11.0) | 20 (6.2) | 0.099 | 7 (10.4) | 5 (2.6) | 0.007 |
| Prior PCI | 65 (59.1) | 219 (68.0) | 0.089 | 0 (0) | 0 (0) | - |
| **Admission presentation** |  |  |  |  |  |  |
| Heart rate | 76 (70-82) | 76 (68-81) | 0.597 | 78 (72-85) | 76 (70-82) | 0.036 |
| Systolic BP | 132 (122-149) | 134 (120-148) | 0.997 | 135 (123-149) | 130 (116-142) | 0.013 |
| Diastolic BP | 78 (69-87) | 77 (68-85) | 0.201 | 80 (73-88) | 76 (67-82) | 0.002 |
| LVEF | 62 (60-64) | 63 (60-65) | 0.002 | 64 (60-66) | 64 (62-66) | 0.216 |
| **Laboratory indices** |  |  |  |  |  |  |
| CRP | 3.02 (3.02-3.23) | 3.02 (2.60-3.23) | 0.060 | 3.02 (2.15-3.16) | 3.02 (3.00-3.23) | 0.300 |
| Serum creatinine | 78.4 (70.1-95.7) | 73.7 (62.5-84.1) | <0.001 | 69.3 (60.5-82.7) | 66.7 (58.5-75.5) | 0.123 |
| TC | 4.14 (3.35-4.72) | 3.51 (2.96-4.27) | <0.001 | 4.45 (3.49-5.01) | 4.04 (3.43-4.78) | 0.136 |
| LDL-c | 2.10 (1.69-2.93) | 1.82 (1.35-2.36) | <0.001 | 2.46 (1.70-3.23) | 2.18 (1.75-2.83) | 0.187 |
| TG | 1.86 (1.12-2.43) | 1.24 (0.96-1.81) | <0.001 | 1.46 (1.07-2.01) | 1.28 (0.92-1.75) | 0.040 |
| Fasting glucose | 5.3 (4.9-6.2) | 5.4 (4.8-6.4) | 0.778 | 5.1 (4.9-5.7) | 5.0 (4.7-5.5) | 0.045 |
| Serum uric acid (mg/dL) | 7.6 (7.2-8.2) | 5.1 (4.4-5.9) | <0.001 | 7.2 (6.4-8.0) | 5.1 (4.2-5.7) | <0.001 |
| Peak TnT | 0.011 (0.007-0.021) | 0.010 (0.007-0.020) | 0.210 | 0.006 (0.005-0.009) | 0.006 (0.004-0.009) | 0.094 |
| Peak NT-pro BNP | 89.2 (42.9-255.0) | 88.3 (45.9-224.0) | 0.993 | 58.5 (28.4-111.3) | 51.1 (29.7-111.0) | 0.862 |
| **D-SPECT characteristics** |  |  |  |  |  |  |
| Summed stress score | 3 (1-4) | 3 (2-5) | 0.292 | 2 (0-4) | 2 (0-4) | 0.938 |
| Summed rest score | 0 (0-2) | 0 (0-2) | 0.851 | 0 (0-1) | 0 (0-1) | 0.471 |
| Summed difference score | 2 (1-3) | 2 (1-3) | 0.035 | 1 (0-3) | 1 (0-2) | 0.914 |
| Stress total perfusion defects | 2 (1-6) | 2 (1-5) | 0.515 | 2 (1-5) | 2 (1-4) | 0.677 |
| Location of defects1 |  |  | 0.094 |  |  | 0.651 |
| Apex | 17 (15.6) | 53 (14.2) |  | 8 (8.4) | 24 (8.9) |  |
| Anterior | 22 (20.2) | 79 (21.1) |  | 27 (28.4) | 71 (26.4) |  |
| Inferior or posterior | 35 (32.1) | 77 (20.6) |  | 15 (15.8) | 55 (20.4) |  |
| Septum | 18 (16.5) | 87 (23.3) |  | 17 (17.9) | 57 (21.2) |  |
| Lateral | 17 (15.6) | 78 (20.9) |  | 28 (29.5) | 62 (23.0) |  |
| Stress LVEF | 62 (56-70) | 64 (57-70) | 0.298 | 67 (61-72) | 68 (62-73) | 0.704 |
| Rest LVEF | 65 (57-71) | 65 (60-72) | 0.167 | 69 (63-75) | 70 (63-76) | 0.723 |
| Transient ischemic dilation | 1.09 (1.01-1.18) | 1.08 (1.01-1.17) | 0.916 | 1.05 (0.97-1.14) | 1.09 (1.02-1.19) | 0.016 |
| **Medication at discharge** |  |  |  |  |  |  |
| Aspirin | 75 (68.2) | 249 (77.3) | 0.056 | 28(41.8) | 79 (40.3) | 0.831 |
| P2Y12 receptor antagonist | 74 (67.3) | 236 (73.3) | 0.226 | 21 (31.3) | 52 (26.5) | 0.448 |
| Statin | 102 (92.7) | 299 (92.9) | 0.964 | 48 (71.6) | 137 (69.9) | 0.787 |
| ACEI/ARB | 58 (52.7) | 168 (52.2) | 0.920 | 27 (40.3) | 51 (26.0) | 0.027 |
| β-blocker | 54 (49.1) | 174 (54.0) | 0.370 | 31 (46.3) | 63 (32.1) | 0.037 |
| CCB | 48 (43.6) | 133 (41.3) | 0.669 | 27 (40.3) | 67 (34.2) | 0.367 |
| Diuretic | 14 (12.7) | 34 (10.6) | 0.532 | 8 (11.9) | 17 (8.7) | 0.431 |
| Urate-lowering agent | 1 (0.9) | 2 (0.6) | 1.000 | 0 (0) | 1 (0.5) | 1.000 |

Values are presented as mean±SD, median (IQR), or n (%), as appropriate. Abbreviations refer to **Online Table 2**.

**Online Table 4.** Sensitivity analysis

| **Excluding patients who receive urate-lowering agent** | | | | |
| --- | --- | --- | --- | --- |
| **Whole cohort** | **Events/Patients** | **%/Year (95%CI)** | **Fully adjusted-HR (95% CI)1** | **P-value** |
| Normouricemia | 150/514 | 15.1 (12.9-17.8) | 1.00 | Reference |
| Hyperuricemia | 63/170 | 20.9 (16.4-26.8) | 1.36 (1.01-1.85) | 0.046 |
| **Obstructive CAD** |  |  |  |  |
| Normouricemia | 110/319 | 18.7 (15.5-22.6) | 1.00 | Reference |
| Hyperuricemia | 41/105 | 23.1 (17.0-31.4) | 1.71 (0.98-2.98) | 0.059 |
| **Nonobstructive CAD** |  |  |  |  |
| Normouricemia | 40/195 | 9.9 (7.3-13.6) | 1.00 | Reference |
| Hyperuricemia | 22/65 | 17.8 (11.7-27.1) | 1.18 (0.81-1.72) | 0.386 |
| **Excluding patients with missing data** | | | | |
| **Whole cohort** | **Events/Patients** | **%/Year (95%CI)** | **Fully adjusted-HR (95% CI)1** | **P-value** |
| Normouricemia | 148/493 | 15.7 (13.3-18.4) | 1.00 | Reference |
| Hyperuricemia | 65/171 | 21.5 (16.9-27.4) | 1.38 (1.02-1.87) | 0.037 |
| **Obstructive CAD** |  |  |  |  |
| Normouricemia | 109/308 | 19.4 (16.0-23.4) | 1.00 | Reference |
| Hyperuricemia | 43/108 | 23.7 (17.6-31.9) | 1.23 (0.84-1.79) | 0.285 |
| **Nonobstructive CAD** |  |  |  |  |
| Normouricemia | 39/185 | 10.2 (7.5-14.0) | 1.00 | Reference |
| Hyperuricemia | 22/63 | 18.2 (12.0-27.6) | 1.70 (0.97-2.98) | 0.062 |

CI, confidence interval; HR, hazard ratio. Other abbreviations refer to **Online Tables 1-3**.

1 Adjustment for age, gender, current smoker, hypertension, diabetes, dyslipidemia, stroke, history of heart failure, creatinine, LVEF, and medication at discharge (aspirin, statin, ACEI/ARB, β-blocker and diuretic).

**Online Table 5.** Sex-specific analysis

| **Whole cohort** | **Normouricemia** | **Hyperuricemia** | **Fully-adjusted HR (95%CI)1** | **P-value** |
| --- | --- | --- | --- | --- |
| Male | 91/289 | 46/103 | 1.73 (1.18-2.53) | 0.005 |
| Female | 60/229 | 20/74 | 0.98 (0.57-1.66) | 0.933 |
| Male | SUA as continuous variable (+1mg/dl) | | 1.14 (1.01-1.29) | 0.034 |
| Female | SUA as continuous variable (+1mg/dl) | | 1.01 (0.84-1.20) | 0.932 |
| **Nonobstructive CAD** |  |  |  |  |
| Male | 18/77 | 12/27 | 2.83 (1.13-7.05) | 0.026 |
| Female | 22/119 | 11/40 | 1.32 (0.61-2.87) | 0.482 |
| Male | SUA as continuous variable (+1mg/dl) | | 1.25 (0.91-1.71) | 0.166 |
| Female | SUA as continuous variable (+1mg/dl) | | 1.22 (0.95-1.58) | 0.125 |
| **Obstructive CAD** |  |  |  |  |
| Male | 73/122 | 34/76 | 1.48 (0.95-2.30) | 0.082 |
| Female | 38/110 | 9/34 | 0.92 (0.41-2.07) | 0.846 |
| Male | SUA as continuous variable (+1mg/dl) | | 1.10 (0.96-1.26) | 0.161 |
| Female | SUA as continuous variable (+1mg/dl) | | 0.94 (0.74-1.20) | 0.627 |

**Abbreviations refer to Online Tables 1-4.**

1 Adjustment for age, gender, current smoker, hypertension, diabetes, dyslipidemia, stroke, history of heart failure, creatinine, LVEF, and medication at discharge (aspirin, statin, ACEI/ARB, β-blocker and diuretic).

**
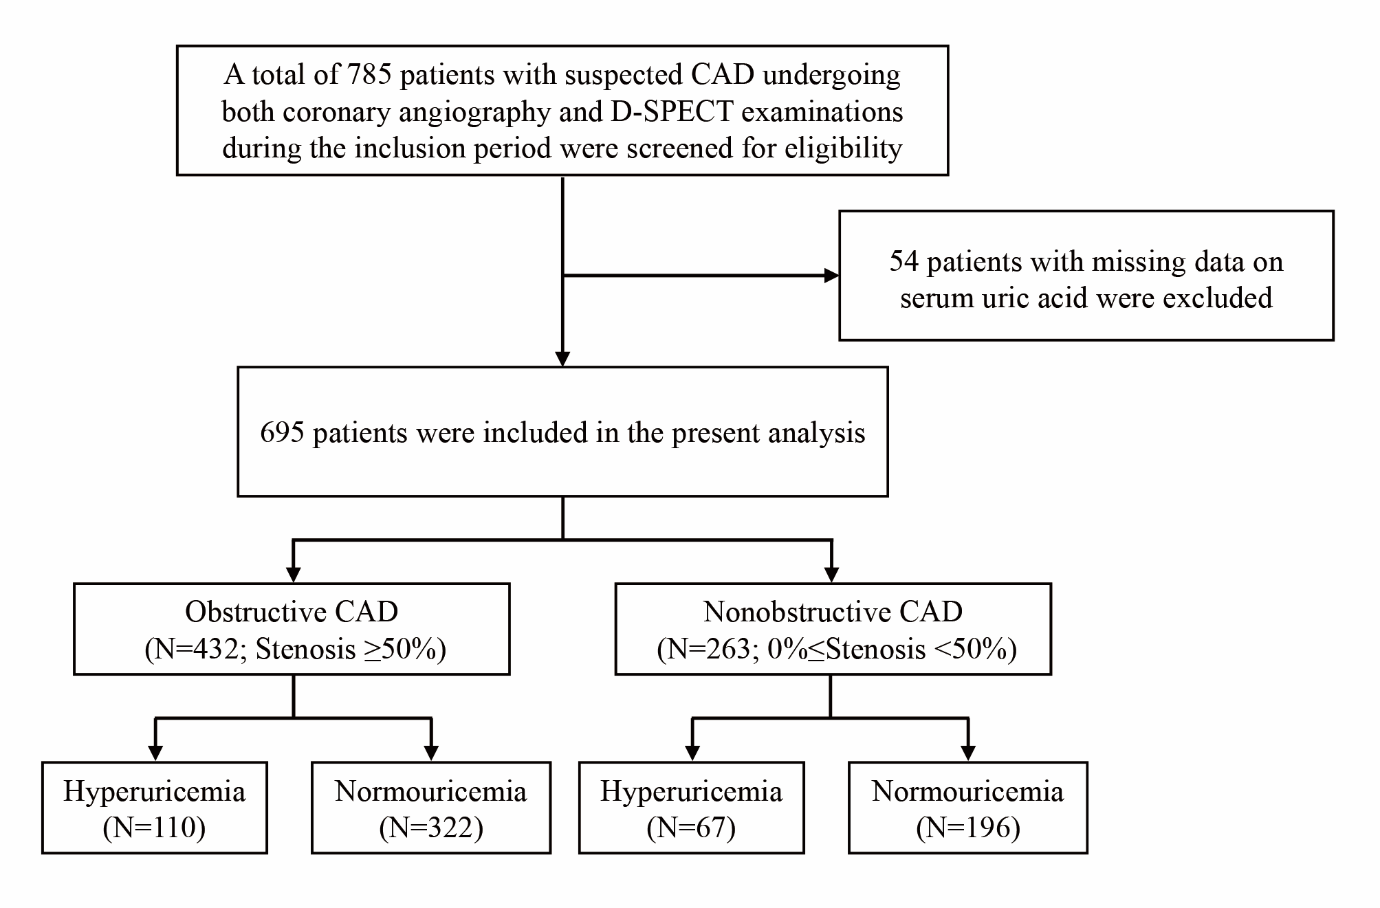
Online Figure 1.** Flowchart of the studied cohort

CAD, coronary artery disease.

**Online Figure 2.** Baseline characteristics of the studied cohort before and after PSM


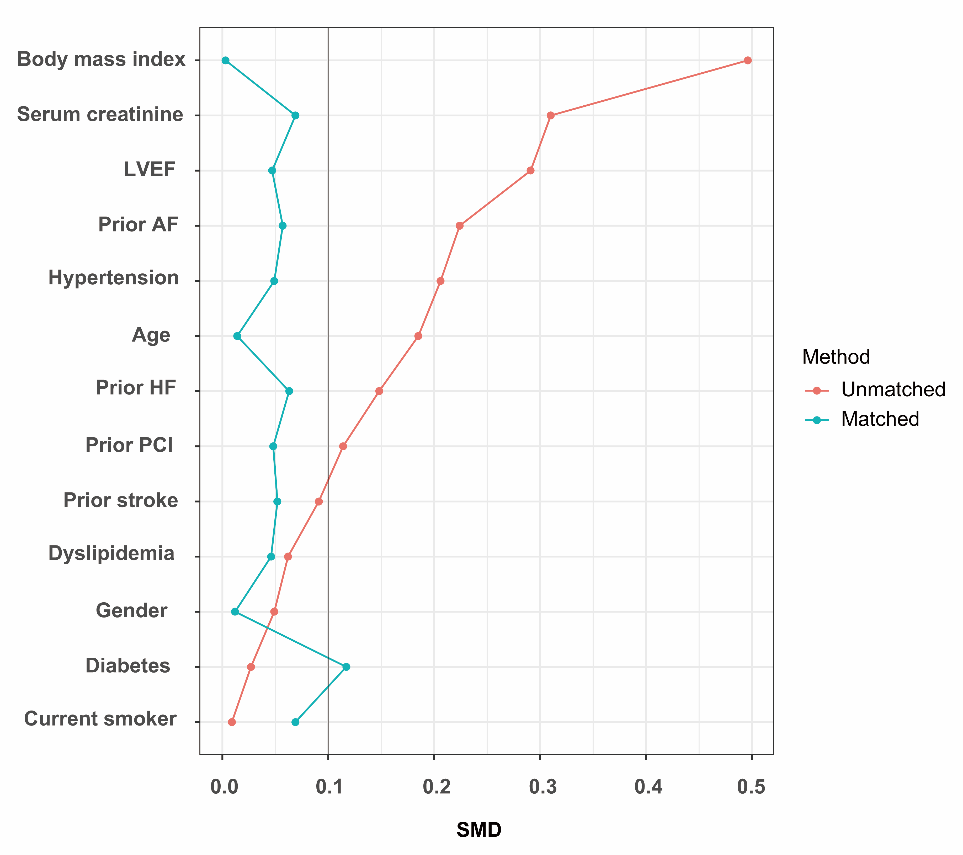


**Online references:**

1. Poldervaart JM, Reitsma JB, Backus BE, Koffijberg H, Veldkamp RF, Ten Haaf ME, et al. Effect of Using the HEART score in Patients With Chest Pain in the Emergency Department: A Stepped-Wedge, Cluster Randomized Trial. Ann Intern Med 2017; 166: 689-697.

2. Lester D, El-Hajj S, Farag AA, Bhambhvani P, Tauxe L, Heo J, et al. Prognostic value of transient ischemic dilation with regadenoson myocardial perfusion imaging. J Nucl Cardiol 2016; 23: 1147-1155.

3. Halligan WT, Morris PB, Schoepf UJ, Mischen BT, Spearman JV, Spears JR, et al. Transient Ischemic Dilation of the Left Ventricle on SPECT: Correlation with Findings at Coronary CT Angiography. J Nucl Med 2014; 55: 917-922.

4. Mazzanti M, Germano G, Kiat H, Kavanagh PB, Alexanderson E, Friedman JD, et al. Identification of severe and extensive coronary artery disease by automatic measurement of transient ischemic dilation of the left ventricle in dual-isotope myocardial perfusion SPECT. J Am Coll Cardiol 1996; 27: 1612-1620.
